# Supplementary material for: Phonon mode transformation in size-evolved solution-processed inorganic lead halide perovskite
Source: Royal Society of Chemistry journal article supplement (doi:10.1039/c7nr09101j), 2018-01-01
Supplement: c7nr09101j1.pdf [file c7nr09101j1.pdf]

## **Supporting Information**

### **Phonon Mode Transformation in Size-evolved Solution-processed Inorganic Lead Halide Perovskite**

Huafeng Shi<sup>1, 2</sup>, Xiaoli Zhang<sup>2</sup>, Xinhai Zhang<sup>2\*</sup>, Xiaowei Sun<sup>2\*</sup>

1. Harbin Institute of Technology, Harbin, 150001, China

2. Department of Electrical & Electronic Engineering, Southern University of Science and Technology, Shenzhen 518055, China

### **Preparation of Cs-oleate solution:**

0.4 g  $\text{Cs}_2\text{CO}_3$  and 1.2 mL OA were loaded into a 3-neck flask along with 15 mL ODE, degassed and dried under vacuum at 120 °C for 1h, and then heated under Ar gas to 150 °C until all  $\text{Cs}_2\text{CO}_3$  reacted with OA.

### **Chemicals and**

$\text{Cs}_2\text{CO}_3$  (99.9%, Aldrich), octadecene (ODE, 90%, Aldrich), oleic acid (OA, 90%, Aldrich),  $\text{PbBr}_2$  (99.999%, Aldrich), oleylamine (OLA, Aldrich, 70%), toluene ( $\geq 99.5\%$ , Aladdin). All chemicals were used as received without further purification.

### **Synthesis of $\text{CsPbBr}_3$ nanocrystals:**

5 mL of octadecylene (ODE) and 0.18 mmol of  $\text{PbBr}_2$  were loaded into a 3-neck flask and degassed under vacuum for 1 h at 100 °C. Certain amount of OLA and OA were injected at 100 °C under Ar gas (typically, 0.5 mL of OLA, 0.5 mL of OA). The temperature was raised to 120 °C for 1 hour, which was allowed for complete dissolution of the  $\text{PbBr}_2$  salt. For the synthesis of  $\text{CsPbBr}_3$  nanocrystals, the solution was kept at 170 °C, and 0.5 mL as-prepared Cs-oleate solution was quickly injected. After a certain reaction duration, the reaction mixture was cooled by an ice-water bath. The size of cubes will increase with reaction duration across nano-cube to micro-cube. Reaction duration less than 10 seconds, there will almost be nano-cubes with length about 20 nm. The size of micro-cube could be more 10  $\mu\text{m}$  with reaction duration about 20 hours.

### **Purification of $\text{CsPbBr}_3$ nanocrystals:**

After quenching by ice water bath, the crude solution was cooled down to room temperature and centrifuged with toluene at 3000 rpm (rounds per minute) for 3 minutes to obtain supernatant. Then the supernatant was centrifuged with toluene at 8000 rpm for 5 minutes to obtain precipitation. After purification, the precipitation was dispersed into toluene to obtain solution.

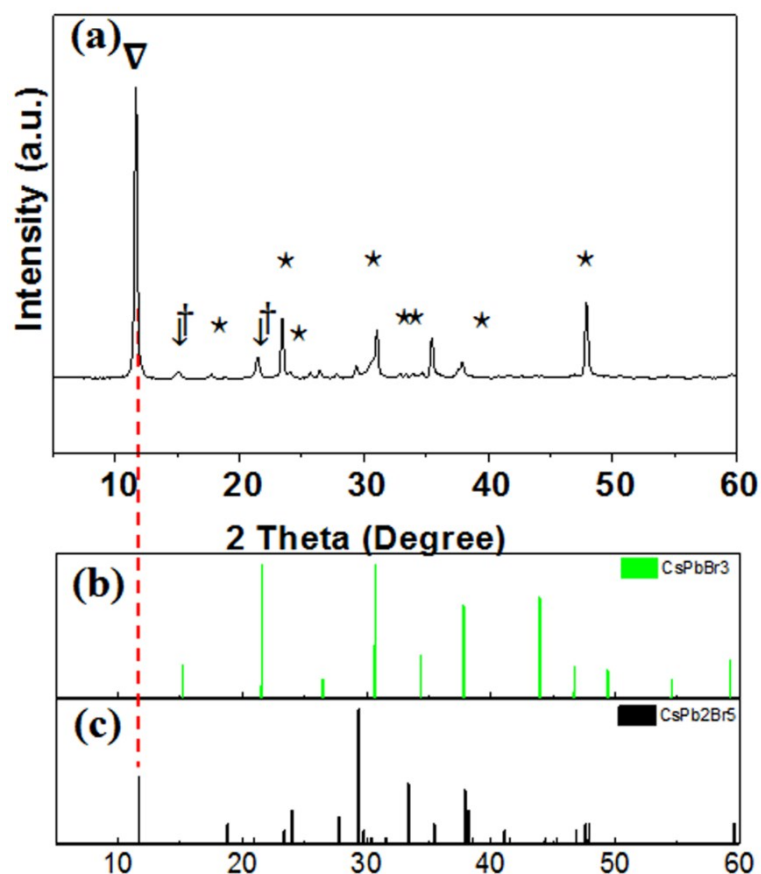

Figure S1: micro-cube perovskite sample (a), CsPbBr<sub>3</sub> cubic structure phase standard card (b), and CsPb<sub>2</sub>Br<sub>5</sub> phase standard card (c). There are different symbols indicate the faces of the crystal structures phase of cubic 1 for CsPbBr<sub>3</sub> (arrow ↓), cubic 2 for CsPbBr<sub>3</sub> (cross ↑), orthorhombic for CsPbBr<sub>3</sub> (star ★), and tetragonal structure CsPb<sub>2</sub>Br<sub>5</sub> (triangle ▽). The strongest peak belongs to facet (002) of CsPb<sub>2</sub>Br<sub>5</sub> phase.

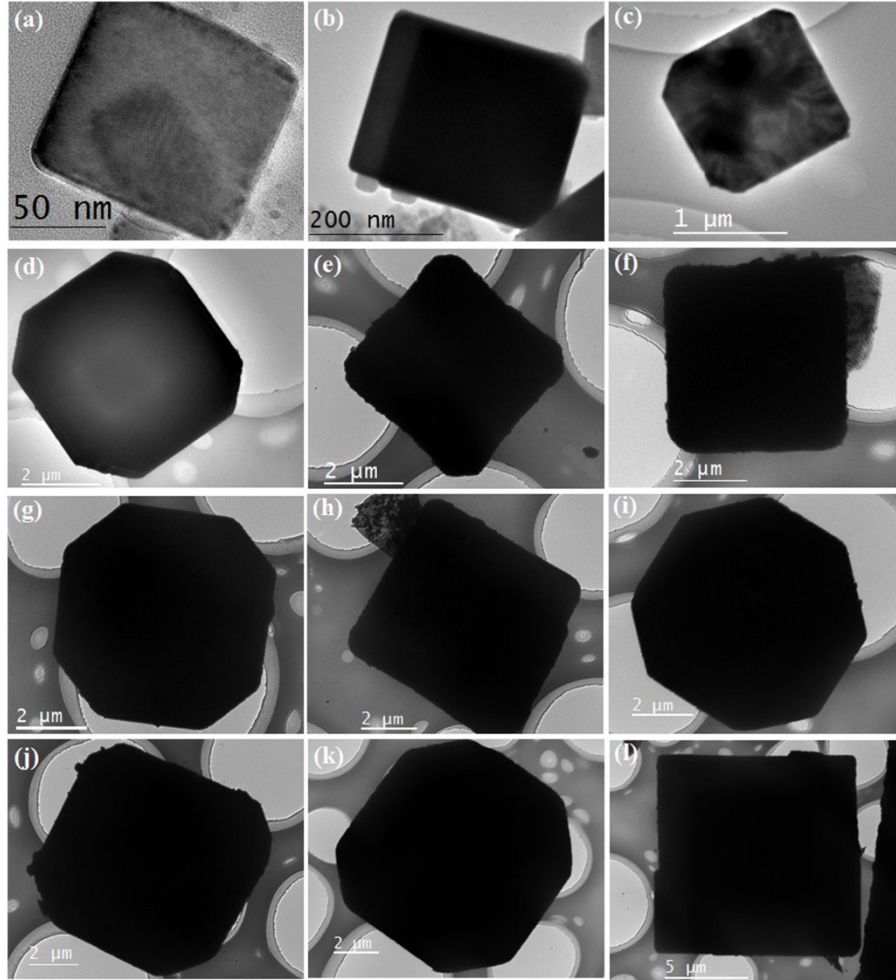

Figure S2: A series of TEM images of pure inorganic lead halide perovskite cube with size increasing from nano-cube to micro-cube. The cube sizes are 100 nm, 300 nm, 1.4  $\mu\text{m}$ , 3  $\mu\text{m}$ , 4  $\mu\text{m}$ , 5  $\mu\text{m}$ , 6  $\mu\text{m}$ , 6.5  $\mu\text{m}$ , 7  $\mu\text{m}$ , 8  $\mu\text{m}$ , 9  $\mu\text{m}$ , and 11.6  $\mu\text{m}$  in (a)-(l), respectively.

There are twelve different size samples, 100 nm, 300 nm, 1.4  $\mu\text{m}$ , 3  $\mu\text{m}$ , 4  $\mu\text{m}$ , 5  $\mu\text{m}$ , 6  $\mu\text{m}$ , 6.5  $\mu\text{m}$ , 7  $\mu\text{m}$ , 8  $\mu\text{m}$ , 9  $\mu\text{m}$ , and 11.6  $\mu\text{m}$  in (a)-(l), respectively. The size of cubes increases with reaction duration from nano-cube to micro-cube. The cubes have two different shapes, octagon and square. The (100) facet is exposed for the square shape, while the (100) and (110) facets are exposed with the octagonal shape. It indicates that the cube had two different growth directions of (100) and (110).<sup>1-2</sup>

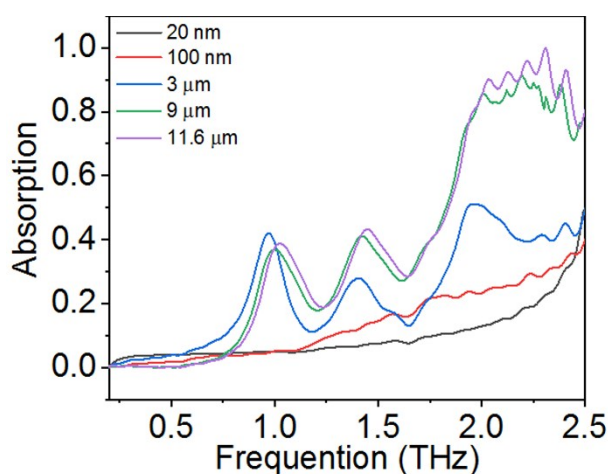

**Figure S3:** Terahertz absorption of pure inorganic lead halide perovskite (20 nm, 100 nm, 3  $\mu\text{m}$ , 9  $\mu\text{m}$ , and 11.6  $\mu\text{m}$ )

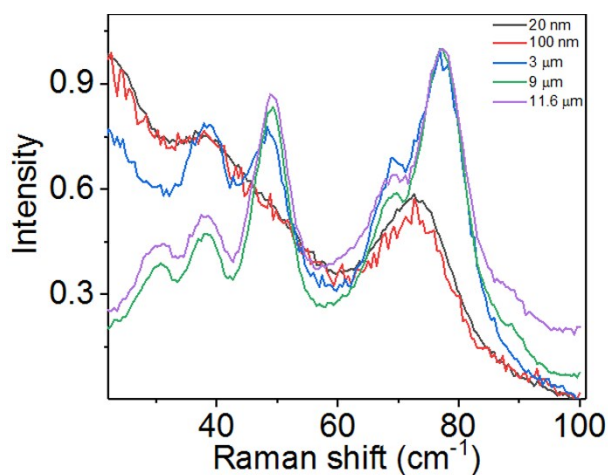

**Figure S4:** Raman shift of pure inorganic lead halide perovskite (20 nm, 100 nm, 3  $\mu\text{m}$ , 9  $\mu\text{m}$ , and 11.6  $\mu\text{m}$ )

Nano-cube samples (20 nm and 100 nm; black and red curve) have similar results of THz and Raman measurement, which could evidence they are mainly composed by cubic phase of perovskite  $\text{CsPbBr}_3$ . Micro-cube samples (3  $\mu\text{m}$ , 9  $\mu\text{m}$ , and 11.6  $\mu\text{m}$ ; blue, green, and purple) have similar results of THz and Raman measurement, which could evidence they are mainly composed by tetragonal phase of perovskite  $\text{CsPb}_2\text{Br}_5$ .

#### Reference:

1. Li, G.; Wang, H.; Zhu, Z.; Chang, Y.; Zhang, T.; Song, Z.; Jiang, Y., Shape and phase evolution from  $\text{CsPbBr}_3$  perovskite nanocubes to tetragonal  $\text{CsPb}_2\text{Br}_5$  nanosheets with an indirect bandgap. *Chem Commun (Camb)* **2016**, 52 (75), 11296-11299.
2. Xia, Y.; Xiong, Y.; Lim, B.; Skrabalak, S. E., Shape-controlled synthesis of metal nanocrystals: simple chemistry meets complex physics? *Angew Chem Int Ed Engl* **2009**, 48 (1), 60-103.
